# Supplementary material for: Socioeconomic inequalities in sport participation: pattern per sport and time trends – a repeated cross-sectional study
Source: Springer Nature journal article supplement (doi:10.1186/s12889-023-15650-7), 2023-04-28
Supplement: MOESM1 [file 25296560]

## SUPPLEMENTARY INFORMATION

*BMC Public Health*

### **Socioeconomic inequalities in sport participation: pattern per sport and time trends – A repeated cross-sectional study**

Viviane Richard MSc.<sup>a</sup>, Giovanni Piumatti PhD.<sup>b</sup>, Nick Pullen PhD.<sup>a</sup>, Elsa Lorthe R.M., PhD.<sup>a</sup>, Idris Guessous MD., PhD.<sup>c,d</sup>, Nicola Cantoreggi PhD.<sup>e</sup>, Silvia Stringhini PhD.<sup>a,f</sup>

- a. Unit of Population Epidemiology, Division of Primary Care Medicine, Geneva University Hospitals, Geneva, Switzerland
- b. Fondazione Agnelli, Turin, Italy
- c. Department of Health and Community Medicine, Faculty of Medicine, University of Geneva, Geneva, Switzerland
- d. Division and Department of Primary Care Medicine, Geneva University Hospitals, Geneva, Switzerland
- e. Institute of Global Health, University of Geneva, Geneva, Switzerland.
- f. University Center for General Medicine and Public Health, University of Lausanne, Switzerland

#### CORRESPONDING AUTHOR

Silvia Stringhini  
[silvia.stringhini@hcuge.ch](mailto:silvia.stringhini@hcuge.ch)  
Unité d'épidémiologie populationnelle  
Rue Jean-Violette 29  
1205 Genève  
Switzerland  
+41 22 305 58 61

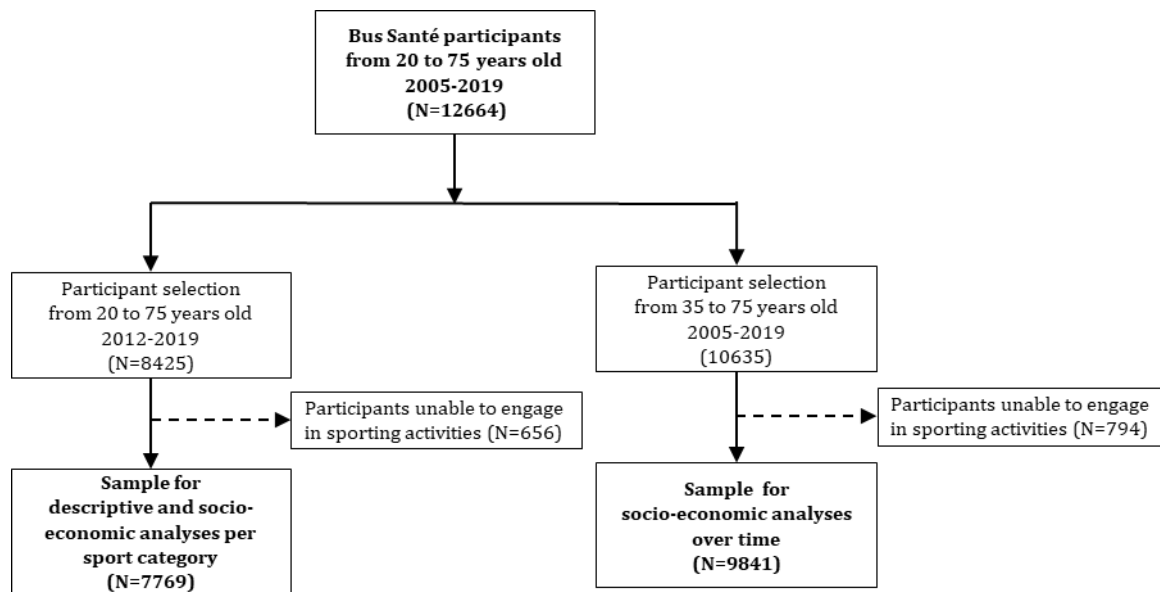

Supplementary 1: Participant's selection process

## Supplementary 2: Relative index of inequality (RII) of the educational level, household income and occupational position among adults aged 20 to 75 years old, stratified by sport category and sex

| Sport category <sup>c</sup>   | All                         |           |                         |           | Men                         |           |                         |           | Women                       |           |                         |           |
|-------------------------------|-----------------------------|-----------|-------------------------|-----------|-----------------------------|-----------|-------------------------|-----------|-----------------------------|-----------|-------------------------|-----------|
|                               | Minimally adj. <sup>a</sup> |           | Fully adj. <sup>b</sup> |           | Minimally adj. <sup>a</sup> |           | Fully adj. <sup>b</sup> |           | Minimally adj. <sup>a</sup> |           | Fully adj. <sup>b</sup> |           |
|                               | RII                         | CI (95%)  | RII                     | CI (95%)  | RII                         | CI (95%)  | RII                     | CI (95%)  | RII                         | CI (95%)  | RII                     | CI (95%)  |
| <b>All</b>                    |                             |           |                         |           |                             |           |                         |           |                             |           |                         |           |
| Educational level             | 1.78                        | 1.64-1.92 | 1.56                    | 1.45-1.69 | 1.77                        | 1.59-1.98 | 1.55                    | 1.39-1.73 | 1.77                        | 1.58-1.98 | 1.56                    | 1.39-1.74 |
| Household income              | 1.61                        | 1.50-1.73 | 1.45                    | 1.35-1.55 | 1.65                        | 1.49-1.81 | 1.48                    | 1.34-1.63 | 1.57                        | 1.42-1.74 | 1.40                    | 1.27-1.56 |
| Occupational position         | 1.60                        | 1.47-1.74 | 1.46                    | 1.35-1.59 | 1.68                        | 1.50-1.88 | 1.54                    | 1.38-1.73 | 1.50                        | 1.32-1.71 | 1.35                    | 1.19-1.54 |
| <b>Individual<sup>c</sup></b> |                             |           |                         |           |                             |           |                         |           |                             |           |                         |           |
| Educational level             | 1.83                        | 1.64-2.03 | 1.56                    | 1.40-1.74 | 1.83                        | 1.59-2.12 | 1.54                    | 1.33-1.77 | 1.81                        | 1.55-2.12 | 1.58                    | 1.34-1.85 |
| Household income              | 1.70                        | 1.55-1.88 | 1.51                    | 1.37-1.66 | 1.66                        | 1.46-1.89 | 1.47                    | 1.29-1.67 | 1.76                        | 1.52-2.04 | 1.55                    | 1.33-1.79 |
| Occupational position         | 1.77                        | 1.58-1.98 | 1.58                    | 1.41-1.77 | 1.89                        | 1.63-2.19 | 1.69                    | 1.46-1.96 | 1.60                        | 1.33-1.93 | 1.42                    | 1.18-1.71 |
| <b>Racket<sup>c</sup></b>     |                             |           |                         |           |                             |           |                         |           |                             |           |                         |           |
| Educational level             | 3.69                        | 2.41-5.64 | 3.18                    | 2.06-4.88 | 5.34                        | 3.13-9.10 | 4.66                    | 2.73-7.94 | 1.68                        | 0.82-3.43 | 1.35                    | 0.64-2.82 |
| Household income              | 2.87                        | 1.98-4.16 | 2.50                    | 1.71-3.66 | 3.65                        | 2.38-5.62 | 3.21                    | 2.07-4.98 | 1.50                        | 0.72-3.14 | 1.22                    | 0.57-2.63 |
| Occupational position         | 2.78                        | 1.87-4.13 | 2.45                    | 1.64-3.68 | 3.69                        | 2.34-5.82 | 3.37                    | 2.13-5.34 | 1.02                        | 0.37-2.79 | 0.71                    | 0.24-2.08 |
| <b>Group<sup>c</sup></b>      |                             |           |                         |           |                             |           |                         |           |                             |           |                         |           |
| Educational level             | 1.79                        | 1.53-2.09 | 1.58                    | 1.35-1.86 | 1.48                        | 1.14-1.92 | 1.31                    | 1.00-1.70 | 2.01                        | 1.66-2.44 | 1.77                    | 1.45-2.16 |
| Household income              | 1.36                        | 1.18-1.57 | 1.22                    | 1.05-1.41 | 1.17                        | 0.92-1.49 | 1.03                    | 0.80-1.32 | 1.49                        | 1.25-1.78 | 1.34                    | 1.12-1.61 |
| Occupational position         | 1.37                        | 1.14-1.65 | 1.27                    | 1.05-1.52 | 1.10                        | 0.83-1.44 | 1.02                    | 0.77-1.35 | 1.65                        | 1.30-2.09 | 1.52                    | 1.19-1.93 |
| <b>Special<sup>c</sup></b>    |                             |           |                         |           |                             |           |                         |           |                             |           |                         |           |
| Educational level             | 4.47                        | 3.20-6.25 | 3.81                    | 2.71-5.38 | 4.78                        | 3.07-7.42 | 4.19                    | 2.67-6.58 | 4.18                        | 2.51-6.97 | 3.41                    | 2.01-5.79 |
| Household income              | 4.34                        | 3.25-5.80 | 3.70                    | 2.75-4.98 | 5.23                        | 3.58-7.64 | 4.51                    | 3.05-6.66 | 3.45                        | 2.19-5.42 | 2.94                    | 1.85-4.67 |
| Occupational position         | 4.06                        | 2.88-5.74 | 3.69                    | 2.59-5.24 | 4.31                        | 2.78-6.70 | 3.99                    | 2.55-6.25 | 3.98                        | 2.24-7.07 | 3.55                    | 1.98-6.38 |

<sup>a</sup> Generalized linear model following a quasi-Poisson distribution, adjusted for age, sex, an interaction between age and sex, and country of birth.

<sup>b</sup> Generalized linear model following a quasi-Poisson distribution, adjusted for age, sex, an interaction between age and sex, country of birth, smoking, BMI, self-perceived health and presence of chronic disease. <sup>c</sup> Sport categories: Individual (running, brisk walking, racing bicycle, strength training/weightlifting, swimming, ice-/roller-skating); Racket (tennis/badminton, squash); Group (dance, football, handball, gymnastics, judo/karate); Special (golf, downhill/water skiing, cross-country skiing, diving)

Supplementary 3: Slope index of inequality (SII) of the educational level, household income and occupational position among adults aged 20 to 75 years old, stratified by sport category and sex

| Sport category <sup>c</sup>   | All                         |           |                         |           | Men                         |            |                         |            | Women                       |            |                         |            |
|-------------------------------|-----------------------------|-----------|-------------------------|-----------|-----------------------------|------------|-------------------------|------------|-----------------------------|------------|-------------------------|------------|
|                               | Minimally adj. <sup>a</sup> |           | Fully adj. <sup>b</sup> |           | Minimally adj. <sup>a</sup> |            | Fully adj. <sup>b</sup> |            | Minimally adj. <sup>a</sup> |            | Fully adj. <sup>b</sup> |            |
|                               | SII                         | CI (95%)  | SII                     | CI (95%)  | SII                         | CI (95%)   | SII                     | CI (95%)   | SII                         | CI (95%)   | SII                     | CI (95%)   |
| <b>All</b>                    |                             |           |                         |           |                             |            |                         |            |                             |            |                         |            |
| Educational level             | 0.33                        | 0.29-0.37 | 0.26                    | 0.21-0.30 | 0.33                        | 0.27-0.40  | 0.26                    | 0.19-0.32  | 0.33                        | 0.26-0.39  | 0.26                    | 0.19-0.32  |
| Household income              | 0.28                        | 0.24-0.32 | 0.22                    | 0.18-0.26 | 0.30                        | 0.24-0.36  | 0.24                    | 0.18-0.30  | 0.27                        | 0.21-0.32  | 0.20                    | 0.14-0.26  |
| Occupational position         | 0.28                        | 0.23-0.33 | 0.23                    | 0.18-0.28 | 0.32                        | 0.25-0.38  | 0.27                    | 0.20-0.33  | 0.24                        | 0.16-0.31  | 0.18                    | 0.10-0.25  |
| <b>Individual<sup>c</sup></b> |                             |           |                         |           |                             |            |                         |            |                             |            |                         |            |
| Educational level             | 0.25                        | 0.21-0.30 | 0.19                    | 0.14-0.23 | 0.27                        | 0.21-0.33  | 0.19                    | 0.13-0.25  | 0.24                        | 0.17-0.30  | 0.18                    | 0.12-0.24  |
| Household income              | 0.23                        | 0.19-0.27 | 0.18                    | 0.14-0.22 | 0.23                        | 0.17-0.29  | 0.18                    | 0.12-0.24  | 0.23                        | 0.17-0.29  | 0.18                    | 0.12-0.24  |
| Occupational position         | 0.26                        | 0.21-0.31 | 0.21                    | 0.15-0.26 | 0.30                        | 0.23-0.37  | 0.25                    | 0.18-0.32  | 0.19                        | 0.12-0.27  | 0.14                    | 0.07-0.22  |
| <b>Racket<sup>c</sup></b>     |                             |           |                         |           |                             |            |                         |            |                             |            |                         |            |
| Educational level             | 0.06                        | 0.04-0.08 | 0.05                    | 0.03-0.07 | 0.11                        | 0.08-0.14  | 0.10                    | 0.07-0.14  | 0.01                        | -0.01-0.03 | 0.01                    | -0.01-0.03 |
| Household income              | 0.06                        | 0.04-0.07 | 0.05                    | 0.03-0.07 | 0.10                        | 0.06-0.13  | 0.09                    | 0.06-0.12  | 0.01                        | -0.01-0.03 | 0.01                    | -0.02-0.03 |
| Occupational position         | 0.06                        | 0.04-0.08 | 0.05                    | 0.03-0.07 | 0.10                        | 0.06-0.13  | 0.09                    | 0.06-0.13  | 0.00                        | -0.03-0.03 | -0.01                   | -0.04-0.02 |
| <b>Group<sup>c</sup></b>      |                             |           |                         |           |                             |            |                         |            |                             |            |                         |            |
| Educational level             | 0.15                        | 0.11-0.19 | 0.12                    | 0.08-0.16 | 0.08                        | 0.03-0.13  | 0.05                    | 0.00-0.11  | 0.21                        | 0.15-0.27  | 0.17                    | 0.12-0.23  |
| Household income              | 0.08                        | 0.04-0.12 | 0.05                    | 0.01-0.09 | 0.03                        | -0.02-0.08 | 0.01                    | -0.04-0.06 | 0.13                        | 0.07-0.18  | 0.09                    | 0.04-0.15  |
| Occupational position         | 0.07                        | 0.03-0.12 | 0.06                    | 0.01-0.10 | 0.02                        | -0.04-0.07 | 0.00                    | -0.05-0.06 | 0.14                        | 0.08-0.21  | 0.12                    | 0.05-0.19  |
| <b>Special<sup>c</sup></b>    |                             |           |                         |           |                             |            |                         |            |                             |            |                         |            |
| Educational level             | 0.11                        | 0.09-0.14 | 0.10                    | 0.08-0.12 | 0.14                        | 0.10-0.18  | 0.13                    | 0.09-0.17  | 0.09                        | 0.06-0.11  | 0.07                    | 0.04-0.10  |
| Household income              | 0.12                        | 0.10-0.15 | 0.11                    | 0.09-0.13 | 0.16                        | 0.13-0.20  | 0.15                    | 0.11-0.19  | 0.08                        | 0.05-0.11  | 0.07                    | 0.04-0.10  |
| Occupational position         | 0.12                        | 0.09-0.15 | 0.11                    | 0.08-0.14 | 0.15                        | 0.11-0.20  | 0.14                    | 0.10-0.19  | 0.08                        | 0.05-0.12  | 0.08                    | 0.04-0.12  |

<sup>a</sup> Linear model adjusted for age, sex, an interaction between age and sex, and country of birth. <sup>b</sup> Linear model adjusted for age, sex, an interaction between age and sex, country of birth, smoking, BMI, self-perceived health and presence of chronic disease. <sup>c</sup> Sport categories: Individual (running, brisk walking, racing bicycle, strength training/weightlifting, swimming, ice-/roller-skating); Racket (tennis/badminton, squash); Group (dance, football, handball, gymnastics, judo/karate); Special (golf, downhill/water skiing, cross-country skiing, diving).

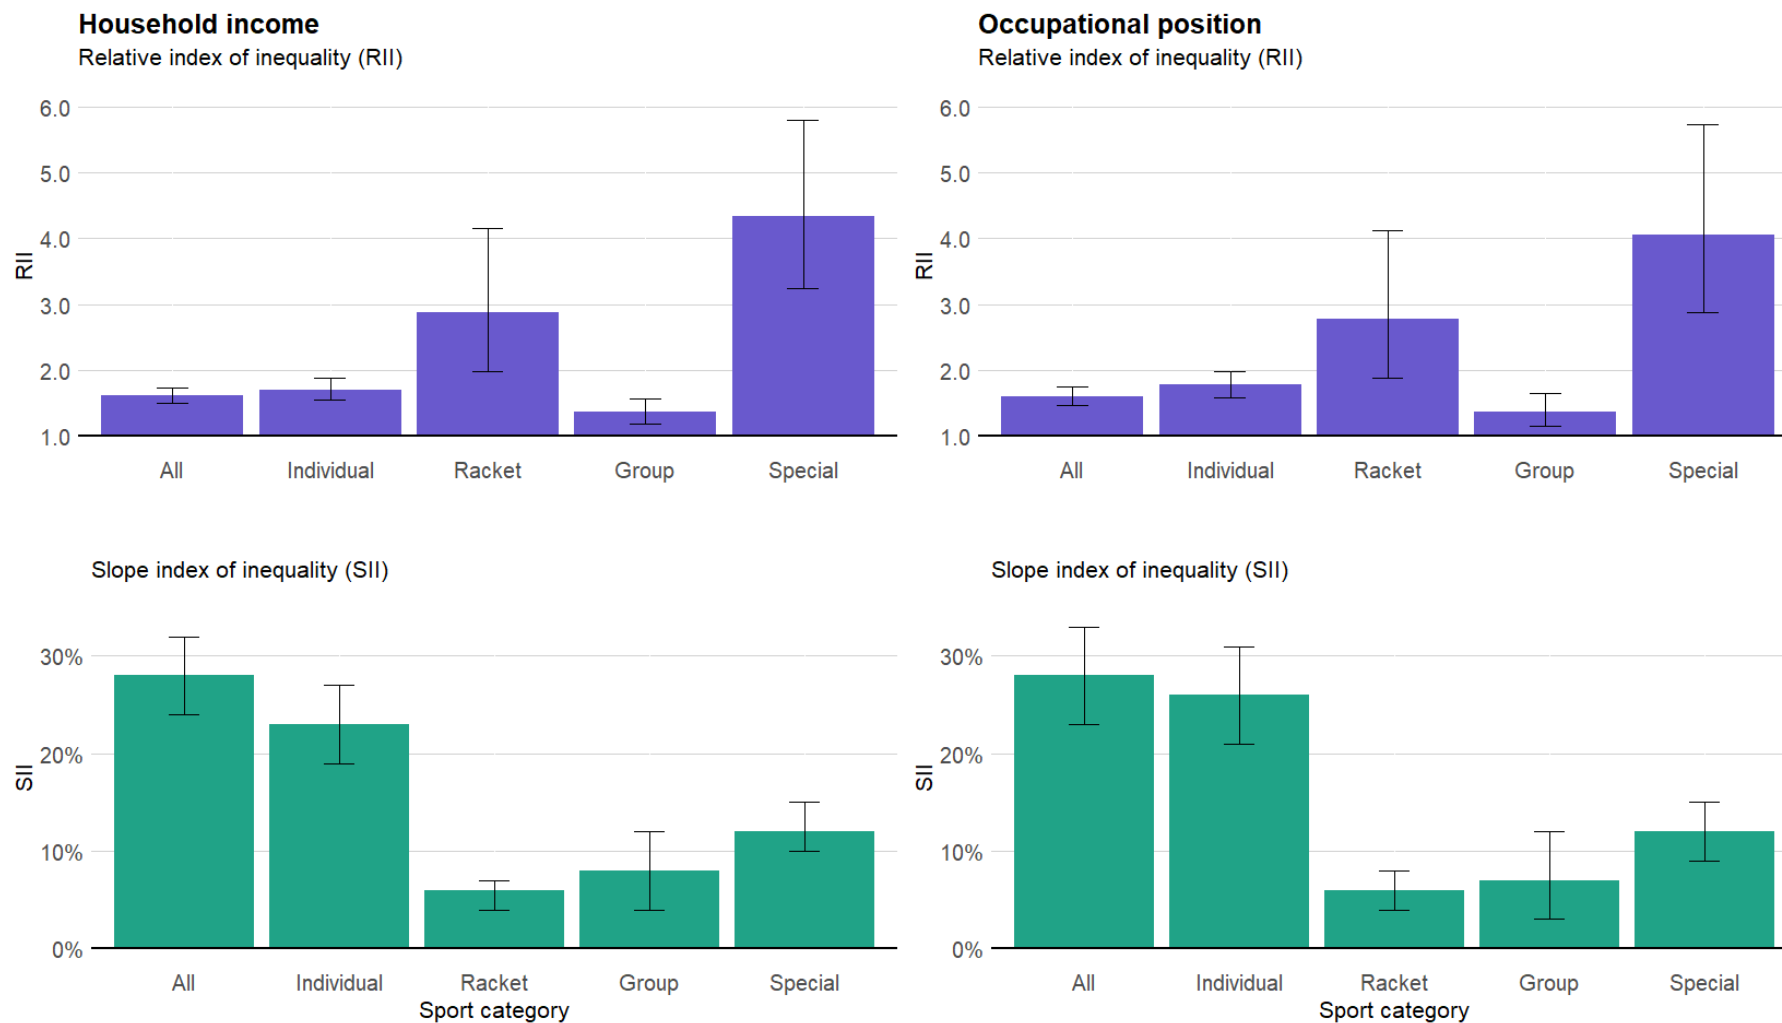

Supplementary 4: Relative and slope indexes of inequality (RII/SII) and 95% confidence intervals of sport participation among Geneva adults aged 20 to 75 years old stratified by sport category. Generalized linear model following a quasi-Poisson distribution for the RII and linear model for the SII. Minimal model, adjusted for age, sex, an interaction between age and sex, and country of birth. Sport categories: Individual (running, brisk walking, racing bicycle, strength training/weightlifting, swimming, ice-/roller-skating); Racket (tennis/badminton, squash); Group (dance, football, handball, gymnastics, judo/karate); Special (golf, downhill/water skiing, cross-country skiing, diving). N=6925 for household income and n=5428 for occupational position.

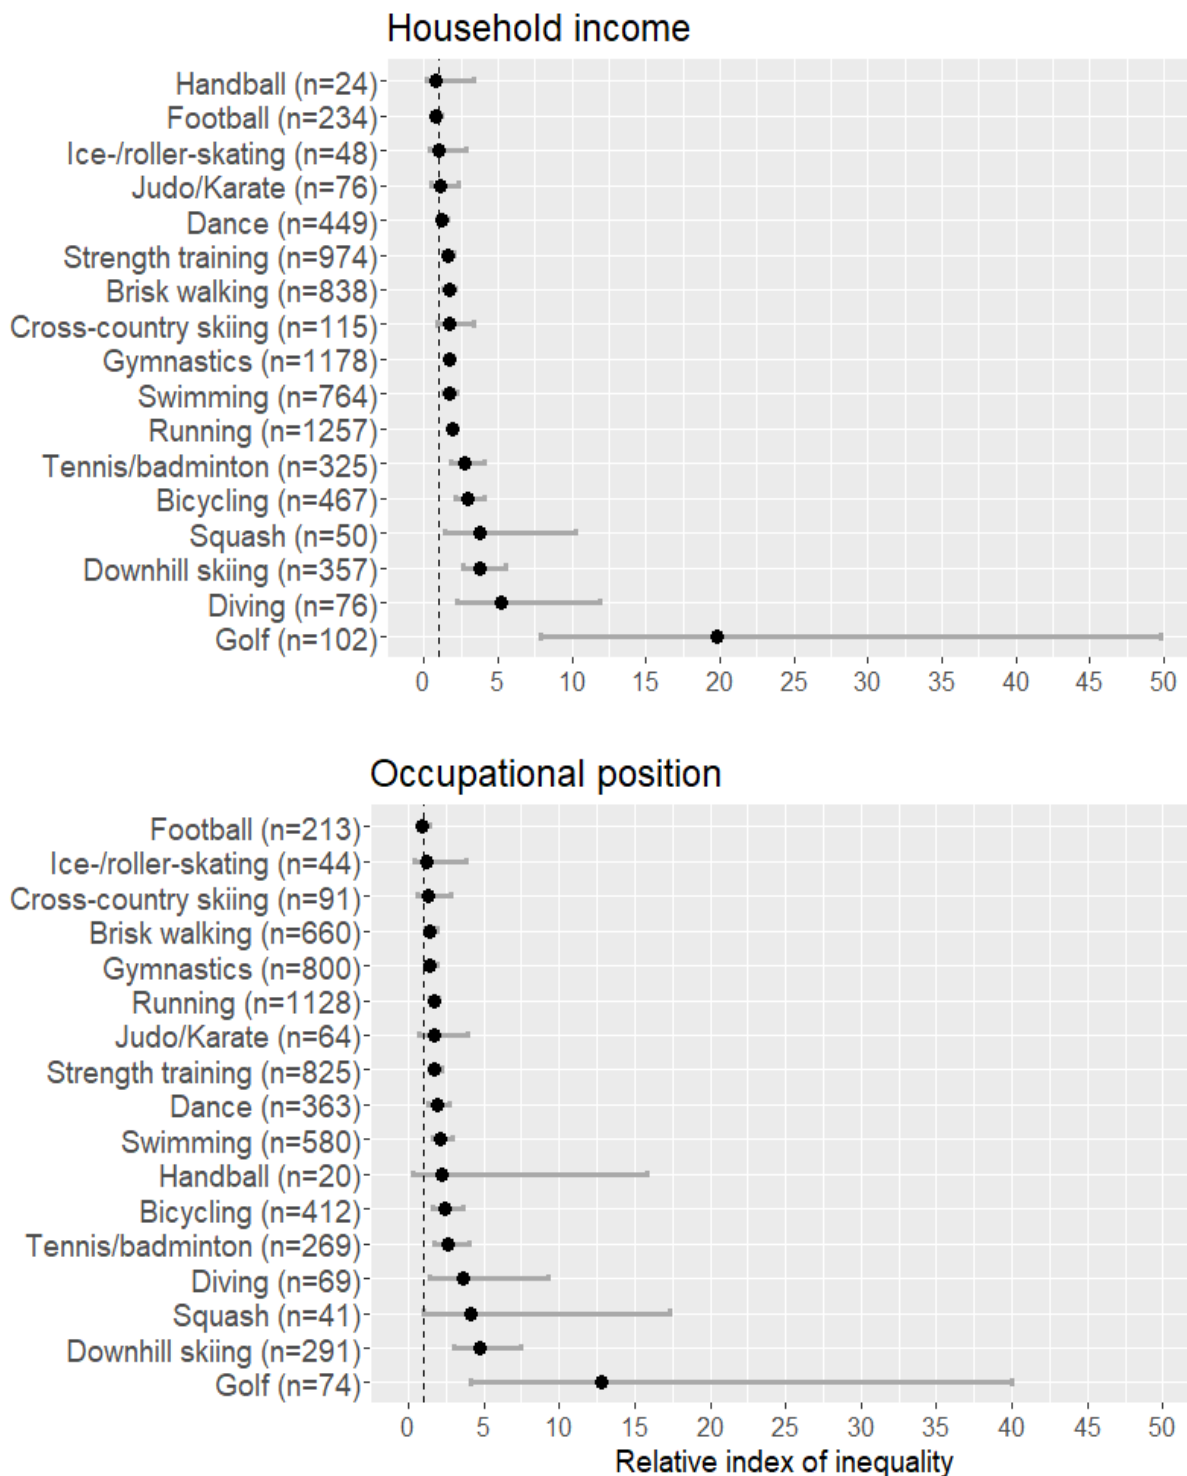

Supplementary 5: Relative index of inequality (RII), stratified by specific sport among Geneva adults aged 20 to 75 years old. Generalized linear model following a quasi-Poisson distribution adjusted for age, sex, an interaction between age and sex, and country of birth. N=6925 for household income and n=5428 for occupational position.

Supplementary 6: Yearly change of the relative and slope index of inequality (RII/SII) of sport participation from 2005 to 2019 among adults aged 35 to 75 years old, and sensitivity analysis from 2008 to 2019

|                                                 | All                         |              | Men                     |         |                             |         | Women                   |         |                             |              | 35-54 years old         |              | 55-75 years old             |         |                         |         |             |              |             |              |
|-------------------------------------------------|-----------------------------|--------------|-------------------------|---------|-----------------------------|---------|-------------------------|---------|-----------------------------|--------------|-------------------------|--------------|-----------------------------|---------|-------------------------|---------|-------------|--------------|-------------|--------------|
|                                                 | Minimally adj. <sup>c</sup> |              | Fully adj. <sup>d</sup> |         | Minimally adj. <sup>c</sup> |         | Fully adj. <sup>d</sup> |         | Minimally adj. <sup>c</sup> |              | Fully adj. <sup>d</sup> |              | Minimally adj. <sup>c</sup> |         | Fully adj. <sup>d</sup> |         |             |              |             |              |
|                                                 | $\beta$                     | P-value      | $\beta$                 | P-value | $\beta$                     | P-value | $\beta$                 | P-value | $\beta$                     | P-value      | $\beta$                 | P-value      | $\beta$                     | P-value | $\beta$                 | P-value |             |              |             |              |
| <b>2005-2019</b>                                |                             |              |                         |         |                             |         |                         |         |                             |              |                         |              |                             |         |                         |         |             |              |             |              |
| <b>Relative index of inequality<sup>a</sup></b> |                             |              |                         |         |                             |         |                         |         |                             |              |                         |              |                             |         |                         |         |             |              |             |              |
| Educational level                               | 1.01                        | 0.184        | 1.02                    | 0.119   | 1.02                        | 0.180   | 1.02                    | 0.348   | 1.01                        | 0.421        | 1.02                    | 0.155        | 1.00                        | 0.808   | 1.00                    | 0.955   | <b>1.04</b> | <b>0.024</b> | <b>1.04</b> | <b>0.013</b> |
| Household income                                | 1.02                        | 0.064        | 1.01                    | 0.281   | 1.01                        | 0.618   | 0.99                    | 0.444   | <b>1.03</b>                 | <b>0.028</b> | <b>1.03</b>             | <b>0.024</b> | 1.00                        | 0.807   | 0.98                    | 0.200   | <b>1.04</b> | <b>0.006</b> | <b>1.05</b> | <b>0.003</b> |
| Occupational position                           | 1.01                        | 0.412        | 1.00                    | 0.794   | 1.01                        | 0.454   | 1.00                    | 0.913   | 1.01                        | 0.665        | 1.01                    | 0.575        | 1.02                        | 0.158   | 1.01                    | 0.479   | 0.99        | 0.806        | 0.99        | 0.575        |
| <b>Slope index of inequality<sup>b</sup></b>    |                             |              |                         |         |                             |         |                         |         |                             |              |                         |              |                             |         |                         |         |             |              |             |              |
| Educational level                               | 0.01                        | 0.099        | 0.01                    | 0.067   | 0.01                        | 0.169   | 0.01                    | 0.242   | 0.01                        | 0.317        | 0.01                    | 0.150        | 0.00                        | 0.545   | 0.00                    | 0.813   | <b>0.02</b> | <b>0.017</b> | <b>0.02</b> | <b>0.008</b> |
| Household income                                | <b>0.01</b>                 | <b>0.024</b> | 0.01                    | 0.148   | 0.01                        | 0.405   | 0.00                    | 0.684   | <b>0.02</b>                 | <b>0.012</b> | <b>0.02</b>             | <b>0.013</b> | 0.00                        | 0.535   | -0.01                   | 0.292   | <b>0.02</b> | <b>0.003</b> | <b>0.02</b> | <b>0.002</b> |
| Occupational position                           | 0.01                        | 0.248        | 0.00                    | 0.587   | 0.01                        | 0.309   | 0.00                    | 0.849   | 0.01                        | 0.589        | 0.01                    | 0.666        | 0.01                        | 0.072   | 0.01                    | 0.291   | 0.00        | 0.869        | -0.01       | 0.598        |
| <b>2008-2019</b>                                |                             |              |                         |         |                             |         |                         |         |                             |              |                         |              |                             |         |                         |         |             |              |             |              |
| <b>Relative index of inequality<sup>a</sup></b> |                             |              |                         |         |                             |         |                         |         |                             |              |                         |              |                             |         |                         |         |             |              |             |              |
| Educational level                               | 1.01                        | 0.404        | 1.01                    | 0.409   | 1.01                        | 0.632   | 1.00                    | 0.847   | 1.01                        | 0.380        | 1.02                    | 0.281        | 1.00                        | 0.978   | 0.99                    | 0.648   | <b>1.03</b> | <b>0.082</b> | <b>1.04</b> | <b>0.037</b> |
| Household income                                | 1.01                        | 0.167        | 1.01                    | 0.442   | 1.00                        | 0.999   | 0.98                    | 0.394   | <b>1.03</b>                 | <b>0.033</b> | <b>1.03</b>             | <b>0.045</b> | 1.00                        | 0.860   | 0.98                    | 0.276   | <b>1.04</b> | <b>0.029</b> | <b>1.05</b> | <b>0.008</b> |
| Occupational position                           | 1.01                        | 0.336        | 1.00                    | 0.748   | 1.01                        | 0.585   | 1.00                    | 0.911   | 1.02                        | 0.379        | 1.00                    | 0.829        | 1.02                        | 0.178   | 1.01                    | 0.563   | 1.00        | 0.961        | 0.99        | 0.834        |
| <b>Slope index of inequality<sup>b</sup></b>    |                             |              |                         |         |                             |         |                         |         |                             |              |                         |              |                             |         |                         |         |             |              |             |              |
| Educational level                               | 0.01                        | 0.330        | 0.01                    | 0.317   | 0.00                        | 0.681   | 0.00                    | 0.777   | 0.01                        | 0.308        | 0.01                    | 0.254        | 0.00                        | 0.781   | 0.00                    | 0.724   | <b>0.02</b> | <b>0.090</b> | <b>0.02</b> | <b>0.032</b> |
| Household income                                | 0.01                        | 0.097        | 0.01                    | 0.283   | 0.00                        | 0.802   | -0.01                   | 0.573   | <b>0.02</b>                 | <b>0.021</b> | <b>0.02</b>             | <b>0.032</b> | 0.00                        | 0.615   | -0.01                   | 0.357   | <b>0.02</b> | <b>0.027</b> | <b>0.02</b> | <b>0.007</b> |
| Occupational position                           | 0.01                        | 0.244        | 0.00                    | 0.587   | 0.01                        | 0.460   | 0.00                    | 0.732   | 0.01                        | 0.332        | 0.00                    | 0.801        | 0.01                        | 0.097   | 0.01                    | 0.384   | 0.00        | 0.980        | 0.00        | 0.841        |

$\beta$  : yearly change of the RII/SII (exponential of the coefficient of the socioeconomic indicator x year term for the RII; coefficient of the socioeconomic indicator x year term for the SII). Results in bold indicate a p-value < 0.05.

<sup>a</sup> Generalized linear model following a quasi-Poisson distribution; <sup>b</sup> Linear model; <sup>c</sup> Adjusted for socioeconomic indicator, age, sex, country of birth, year, and interactions: age x sex, socioeconomic indicator x year, age x year, sex x year, country of birth x year; <sup>d</sup> Adjusted for socioeconomic indicator, age, sex, country of birth, smoking, BMI, self-perceived health, presence of chronic disease and interactions: year, age x sex, socioeconomic indicator x year, age x year, sex x year, country of birth x year, smoking x year, BMI x year, self-perceived health x year, presence of chronic disease x year.

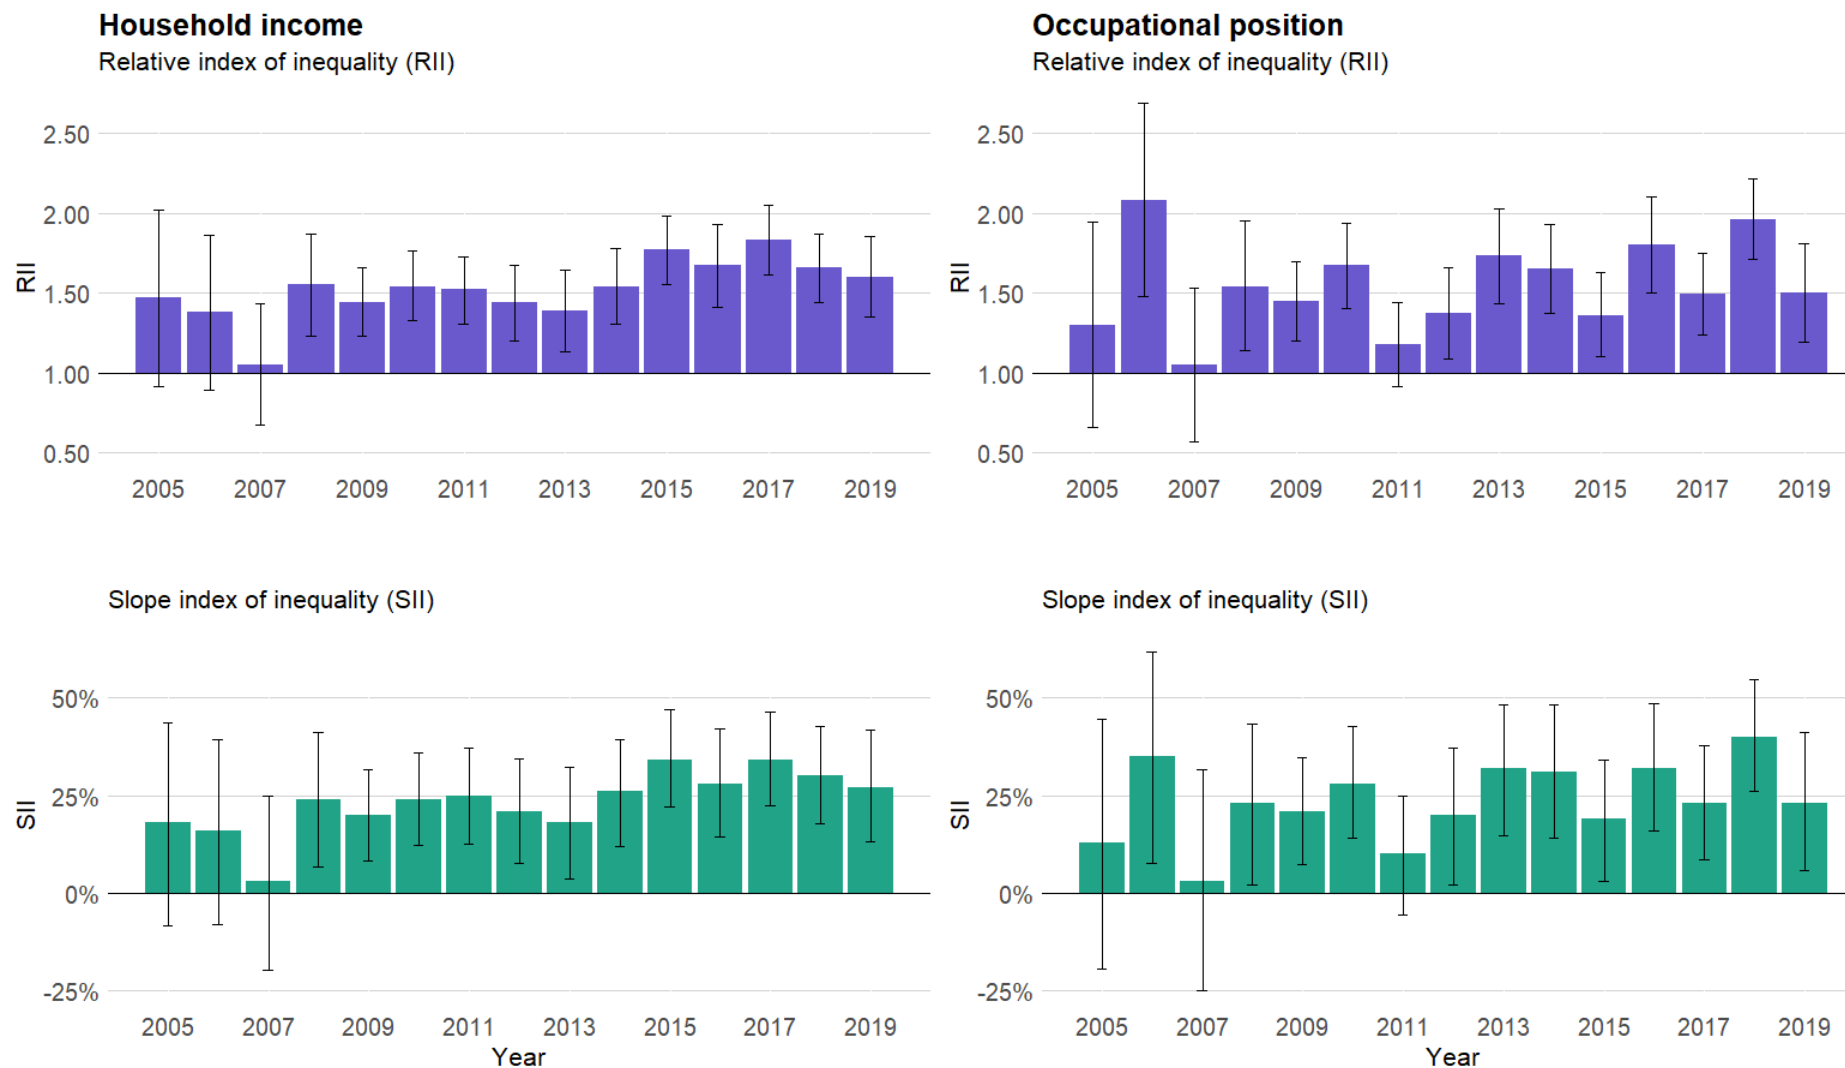

Supplementary 7: Relative and slope indexes of inequality (RII/SII) and 95% confidence intervals of sport participation, per year, among Geneva adults aged 35 to 75 years old. Generalized linear model following a quasi-Poisson distribution for the RII and linear model for the SII. Minimal model adjusted for sex, age, an interaction between age and sex, and country of birth. N=9251 for household income and n=6967 for occupational position.
